# Supplementary material for: Cellular and Biophysical Pipeline for the Screening of Peroxisome Proliferator-Activated Receptor Beta/Delta Agonists: Avoiding False Positives
Source: PPAR Res. 2018 Apr 12;2018:3681590. doi: 10.1155/2018/3681590 (PMC5924986; doi:10.1155/2018/3681590)
Supplement: Supplementary 2 — Supplementary Figure 2: ANS quenching curves of PPARß/δ submitted to GW0742 (left) or extract 02 (right) titration. 10 μM of hPPARß/δ LBD and 10 μM of ANS were used. The found Kds (6.3 ± 1.3 μM fo GW0742 and 113.9 ± 75 μg/mL for extract 2) are probably overestimated, due to the fact that there are more than one possible ANS binding site in hPPARß/δ LBD, which are not necessary located into the LBP, but it is still possible to observe that both GW0742 and extract 02 dislocated ANS from PPARß/δ LBP. Data are the mean ± SD (n = 3 independent replicates). [file 3681590.f2.zip]

Archive with 3 entries (2 files):
- 3681590.f2/
- 3681590.f2/Figueira Suppl Fig 2left_PPAR_2187811.eps
- 3681590.f2/Figueira Suppl Fig 2right_PPAR_2187812.eps
